# Supplementary material for: Two new Ln/Ag heterometallic-based conversion phosphors constructed by 1H-benzimidazole-5,6-dicarboxylic acid
Source: Royal Society of Chemistry journal article supplement (doi:10.1039/c1ce06012k), 2012-01-01
Supplement: c1ce06012k.pdf [file c1ce06012k.pdf]

## Supporting Information of

# Two new Ln/Ag heterometallic-based conversion phosphor constructed by 1*H*-benzimidazole-5, 6-dicarboxylic acid

Fu Ding<sup>a</sup>, Xiao Song<sup>a</sup>, Bing Jiang<sup>a</sup>, Philippe F. Smet<sup>b</sup>, Dirk Poelman<sup>b</sup>, Gang Xiong<sup>a</sup>, Yong-Li Wu<sup>a</sup>, En-Jun Gao<sup>a</sup>, Francis Verpoort<sup>c</sup>, Ya-Guang Sun<sup>a\*</sup>

<sup>a</sup>Laboratory of Coordination Chemistry, Shenyang University of Chemical Technology, Shenyang 110142, China

<sup>b</sup>LumiLab, Department of Solid State Sciences, Ghent University, Ghent, 9000, Belgium

<sup>c</sup>Department of Inorganic and Physical Chemistry, Ghent University, Ghent, 9000, Belgium

### AUTHOR INFORMATION

#### Corresponding Author

\*E-mail: yaguangsun@yahoo.com.cn

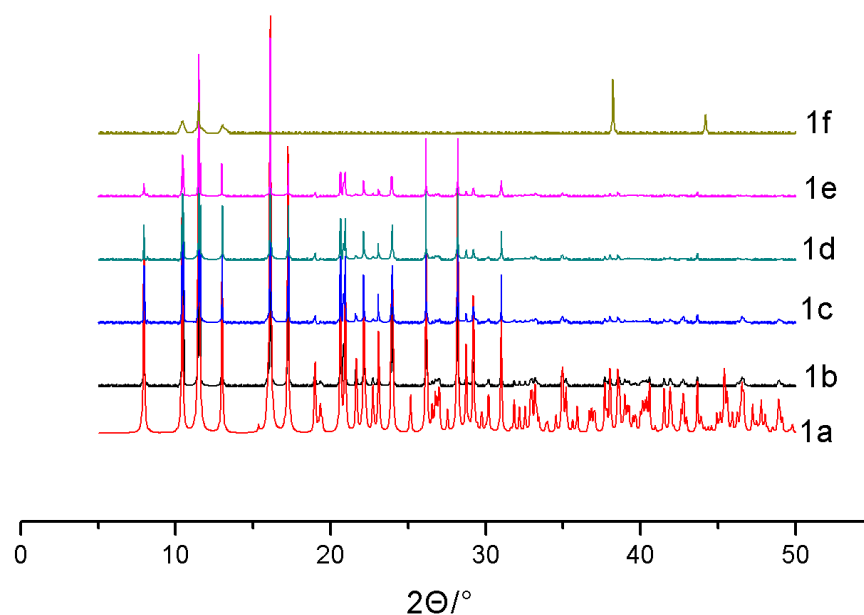

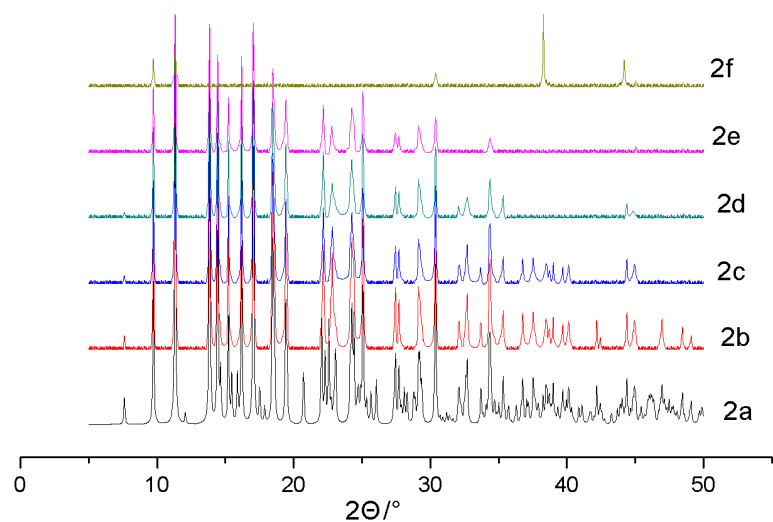

Fig. S1 The simulated and experimental PXRD patterns of **1** and **2**. the simulated (a); the experimental at 25°C (b), 80°C (c), 150°C (d), 250°C (e), 350°C (f)

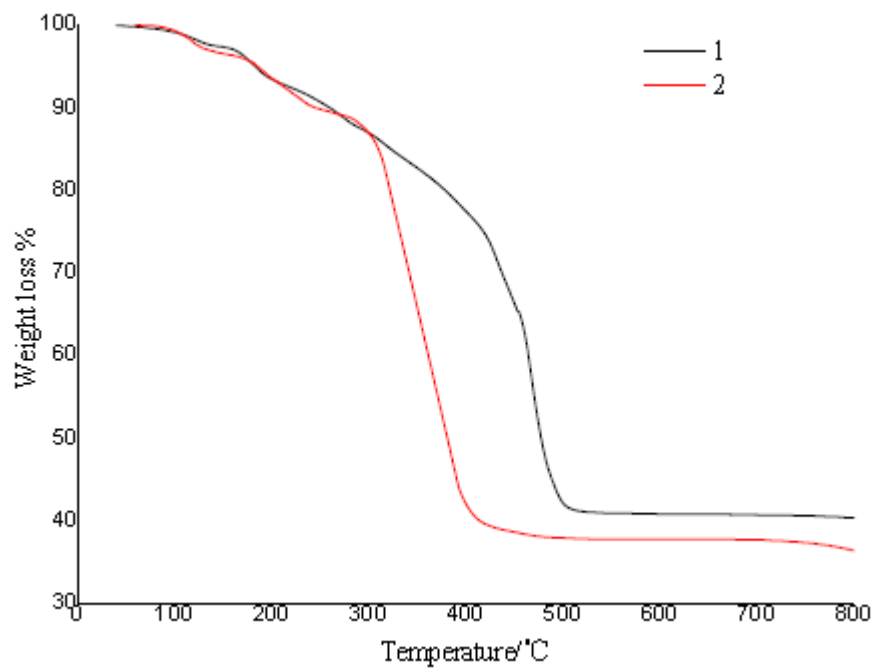

Fig. S1 The TGA of **1** and **2**

**Table S1** A summary of the selected bond distances (Å) and bond angles (°) for complex **1** and **2**

| complex <b>1</b>   |            |                     |            |
|--------------------|------------|---------------------|------------|
| Ho(1)-O(2)#1       | 2.295(3)   | O(2)#1-Ho(1)-O(3)#  | 174.67(12) |
| Ho(1)-O(1)         | 2.341(3)   | O(2)#1-Ho(1)-O(1)   | 133.67(13) |
| Ho(1)-O(9)         | 2.478(3)   | O(2)#1-Ho(1)-O(12)  | 143.63(12) |
| Ho(1)-O(3)#1       | 2.306(3)   | O(1)-Ho(1)-O(12)    | 79.21( 3)  |
| Ho(1)-O(12)        | 2.362(3)   | O(8)-Ho(1)-O(5)     | 149.70(12) |
| Ho(1)-O(6)         | 2.562(3)   | O(2)#1-Ho(1)-O(9)   | 71.37(12)  |
| Ho(1)-O(8)         | 2.337(3)   | O(1)-Ho(1)-O(9)     | 147.65(13) |
| Ho(1)-O(5)         | 2.370(3)   | O(2)#1-Ho(1)-O(6)   | 70.02(11)  |
| Ag(1)-N(2)         | 2.185(4)   | O(1)-Ho(1)-O(6)     | 68.52(11)  |
| Ag(1)-N(3)#1       | 2.157(4)   | O(9)-Ho(1)-O(6)     | 116.00(10) |
| Ag(1)-O(5)#2       | 2.695(4)   | N(2)-Ag(1)-O(5)#2   | 95.03(14)  |
| O(2)#1-Ho(1)-O(8)  | 96.67(12)  | O(3)#1-Ho(1)-O(8)   | 77.70(12)  |
| O(3)#1-Ho(1)-O(1)  | 77.90(13)  | O(8)-Ho(1)-O(1)     | 113.04(11) |
| O(3)#1-Ho(1)-O(12) | 136.94(12) | O(8)-Ho(1)-O(12)    | 78.49(12)  |
| O(2)#1-Ho(1)-O(5)  | 85.66(12)  | O(3)#1-Ho(1)-O(5)   | 131.39(12) |
| O(1)-Ho(1)-O(5)    | 85.32(10)  | O(12)-Ho(1)-O(5)    | 81.88(12)  |
| O(3)#1-Ho(1)-O(9)  | 134.08(11) | O(8)-Ho(1)-O(9)     | 76.57(11)  |
| O(12)-Ho(1)-O(9)   | 72.47(12)  | O(5)-Ho(1)-O(9)     | 75.63(11)  |
| O(3)#1-Ho(1)-O(6)  | 78.82(12)  | O(8)-Ho(1)-O(6)     | 155.42(11) |
| O(12)-Ho(1)-O(6)   | 124.59(11) | O(5)-Ho(1)-O(6)     | 52.61(11)  |
| N(3)#1-Ag(1)-N(2 ) | 151.83(14) | N(3)#1-Ag(1)-O(5)#2 | 107.72(13) |
| Complex <b>2</b>   |            |                     |            |
| Eu(1)-O(3)         | 2.395(10)  | Eu(1)-O(5)          | 2.614(11)  |
| Eu(1)-O(23)        | 2.502(12)  | Eu(1)-O(7)          | 2.479(10)  |
| Eu(1)-O(8)         | 2.501(10)  | Eu(1)-O(18)         | 2.407(11)  |
| Eu(1)-O(12)        | 2.529(12)  | Eu(1)-O(9)          | 2.433(10)  |
| Eu(1)-O(6)         | 2.467(10)  | Ag(1)-N(1)          | 2.124(13)  |
| Ag(1)-N(4)#1       | 2.130(13)  | Ag(1)-O(1)#2        | 2.695(4)   |

|                   |          |                   |          |
|-------------------|----------|-------------------|----------|
| O(3)-Eu(1)-O(8)   | 144.0(3) | O(18)-Eu(1)-O(8)  | 77.7(4)  |
| O(9)-Eu(1)-O(8)   | 74.2(3)  | O(18)-Eu(1)-O(7)  | 121.8(4) |
| O(6)-Eu(1)-O(8)   | 129.4(3) | O(6)-Eu(1)-O(7)   | 78.8(3)  |
| O(9)-Eu(1)-O(7)   | 109.0(4) | O(12)-Eu(1)-O(5)  | 66.5(3)  |
| N(1)-Ag(1)-N(4)#1 | 163.1(5) | O(3)-Eu(1)-O(23)  | 82.3(4)  |
| O(23)-Eu(1)-O(5)  | 121.1(4) | O(3)-Eu(1)-O(18)  | 90.4(4)  |
| O(3)-Eu(1)-O(9)   | 70.2(4)  | O(18)-Eu(1)-O(9)  | 79.3(4)  |
| O(3)-Eu(1)-O(6)   | 84.6(3)  | O(18)-Eu(1)-O(6)  | 127.7(4) |
| O(9)-Eu(1)-O(6)   | 143.9(4) | O(3)-Eu(1)-O(7)   | 147.6(4) |
| O(7)-Eu(1)-O(8)   | 52.5(3)  | O(8)-Eu(1)-O(5)   | 137.4(4) |
| O(18)-Eu(1)-O(23) | 154.8(4) | O(9)-Eu(1)-O(23)  | 75.5(4)  |
| O(6)-Eu(1)-O(23)  | 75.8(4)  | O(7)-Eu(1)-O(23)  | 66.7(4)  |
| O(8)-Eu(1)-O(23)  | 94.1(4)  | O(3)-Eu(1)-O(12)  | 135.1(4) |
| O(18)-Eu(1)-O(12) | 70.6(4)  | O(9)-Eu(1)-O(12)  | 138.9(4) |
| O(6)-Eu(1)-O(12)  | 77.1(4)  | O(7)-Eu(1)-O(12)  | 67.5(3)  |
| O(8)-Eu(1)-O(12)  | 72.7(4)  | O(23)-Eu(1)-O(12) | 130.2(4) |
| O(3)-Eu(1)-O(5)   | 70.0(4)  | O(18)-Eu(1)-O(5)  | 78.0(4)  |
| O(9)-Eu(1)-O(5)   | 133.6(4) | O(6)-Eu(1)-O(5)   | 51.4(3)  |
| O(7)-Eu(1)-O(5)   | 117.4(3) |                   |          |

---
